# Supplementary material
Source: MDPI journal article supplement (https://www.mdpi.com/2073-4344/12/10/1187)
Supplement: s1 [file s1]

## Supporting Information

# Hierarchical porous carbon fibers for enhanced interfacial electron transfer of electroactive biofilm electrode

Ruijie Wang<sup>1,2</sup>, Xiao-shuai Wu<sup>3</sup>, Chang Liu<sup>1,2</sup>, Jing Yang<sup>1,2</sup>, Xian Luo<sup>1,2</sup>, Long Zou<sup>4</sup>, Zhisong Lu<sup>1,2</sup>, Yan Qiao<sup>1,2\*</sup>

<sup>1</sup> Institute for Clean Energy and Advanced Materials, School of Materials and Energy, Southwest University, Chongqing 400715, China.

<sup>2</sup> Chongqing Key Laboratory for Advanced Materials and Technologies of Clean Energies, Chongqing 400715, P.R. China;

<sup>3</sup> Institute of Materials Science and Devices, Suzhou University of Science and Technology, Suzhou 215011, China.

<sup>4</sup> College of Life Sciences, Jiangxi Normal University, Nanchang 330022, China

\* Correspondence: yanqiao@swu.edu.cn

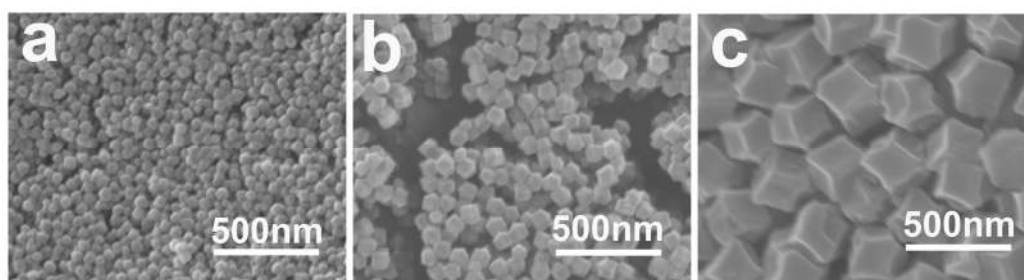

**Figure S1.** FESEM images of ZIF-8 nanoparticles of different sizes (a) 50 nm, (b) 100nm and (c) 200nm.

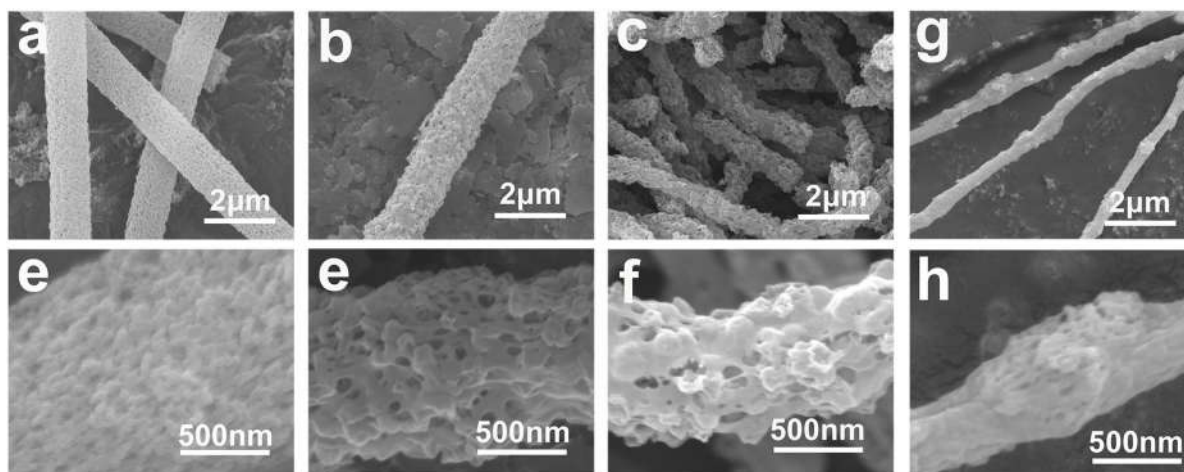

**Figure S2.** FESEM images of electrospun carbon fibers prepared by different nano templates. (a, d) ZnO nanoparticles of 50nm, (b, e) ZIF-8 nanoparticles of 100nm, (c, f) ZIF-8 nanoparticles of 200 nm.

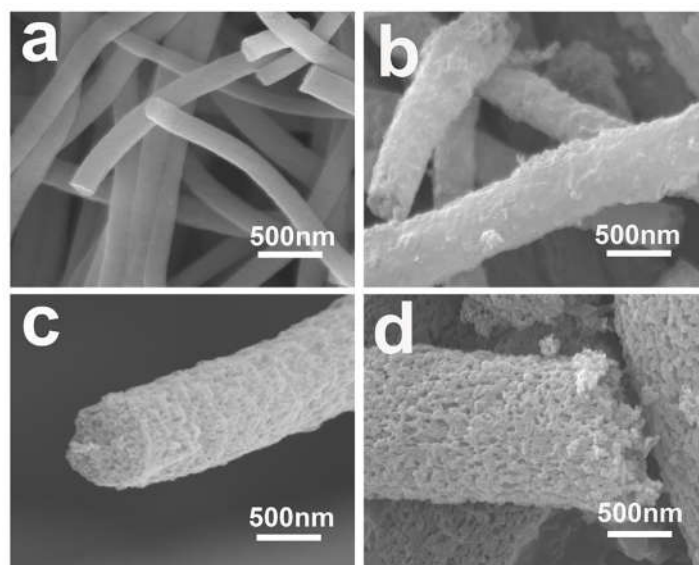

**Figure S3.** FESEM images of cross-section of carbon fibers (a) CPAN, (b) NPCF-1, (c) NPCF-2, (d) NPCF-3.

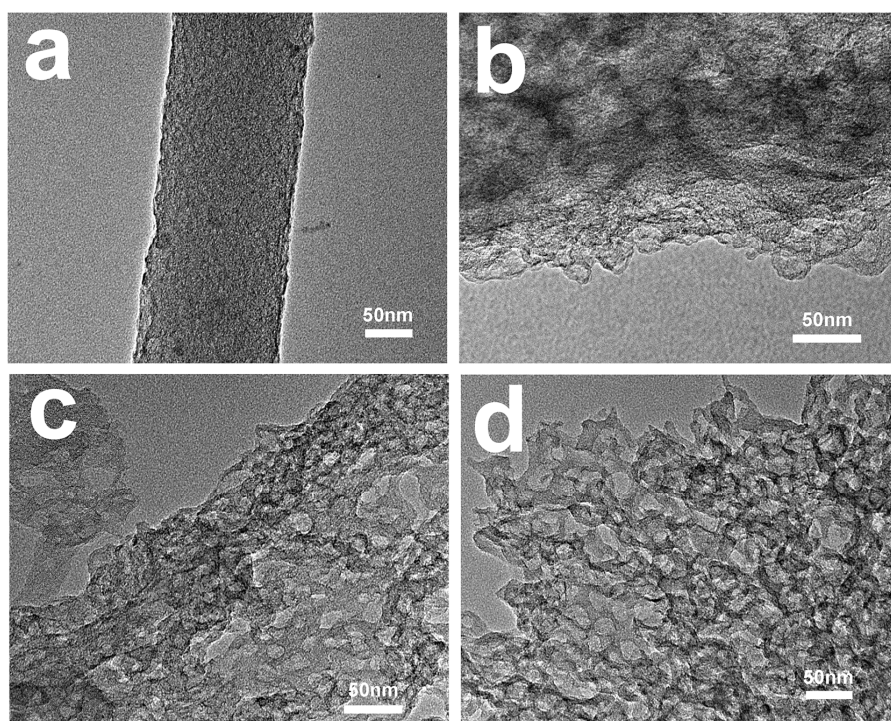

**Figure S4.** TEM images of carbon fibers (a) CPAN, (b) NPCF-1, (c) NPCF-2, (d) NPCF-3.

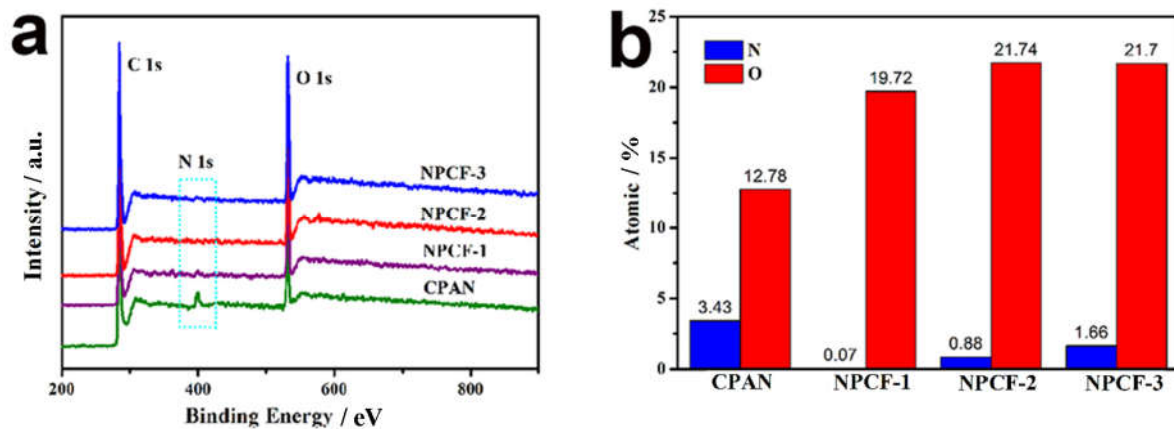

**Figure S5.** (a) XPS survey spectra, (b) the atomic percentage of N and O of CPAN, NPCF-1, NPCF-2 and NPCF-3.

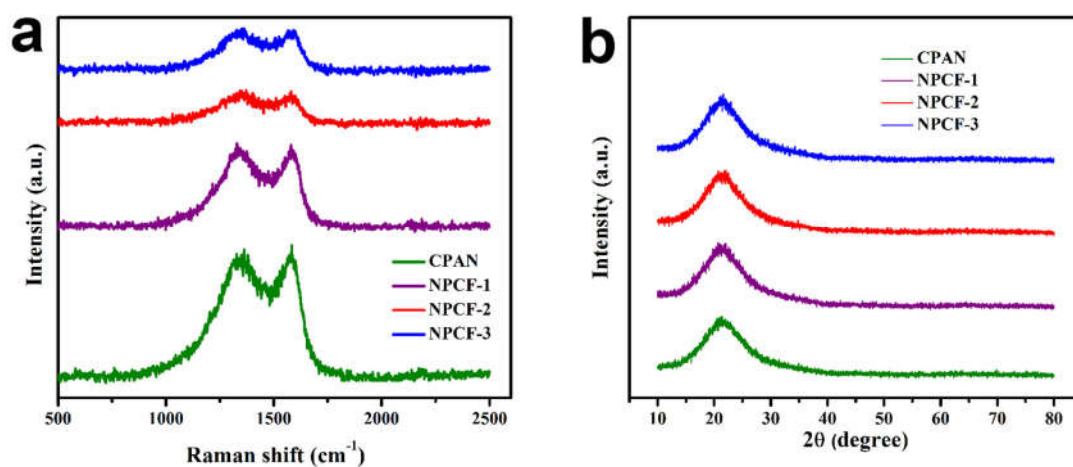

**Figure S6.** Raman spectra and XRD patterns of CPAN, NPCF-1, NPCF-2 and NPCF-3.

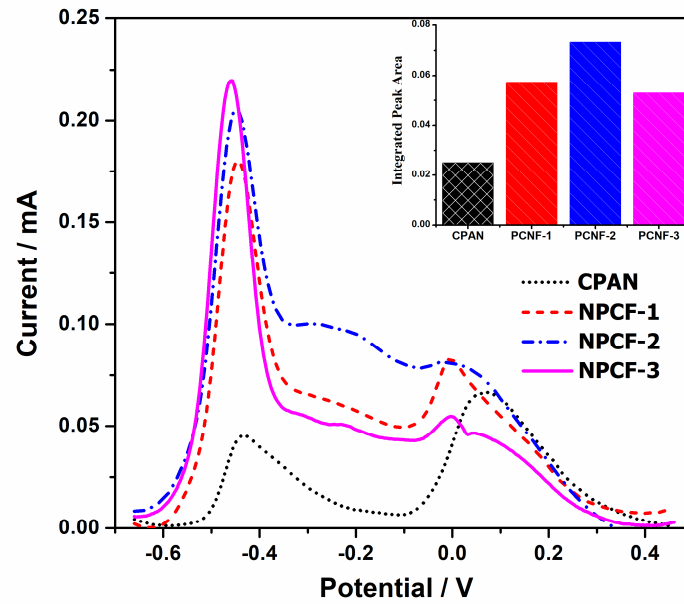

Figure S7. DPV curves of different anodes in the

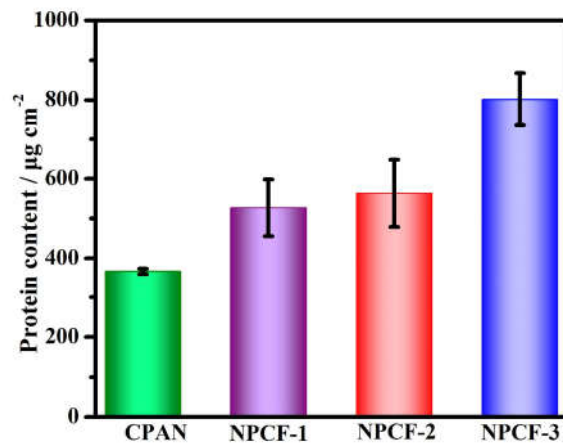

Figure S8. Total protein content of the biofilm on CPAN, NPCF-1, NPCF-2 and NPCF-3.

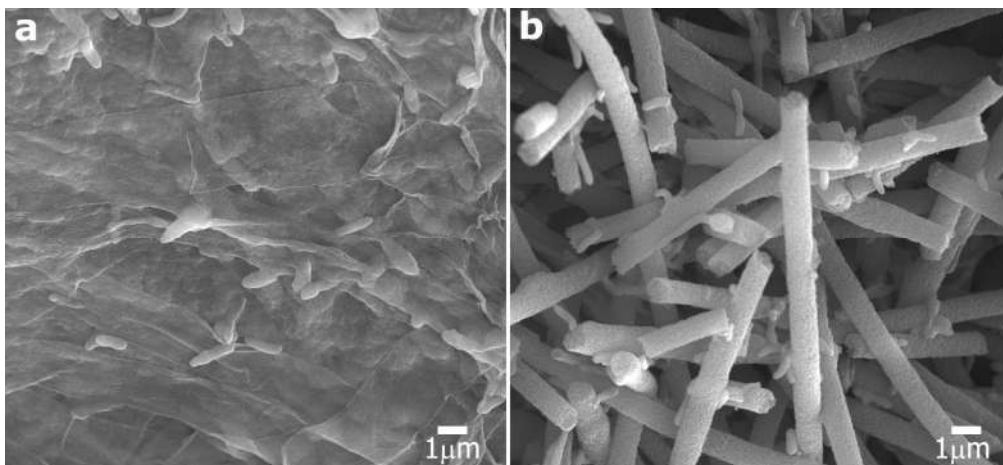

**Figure S9.** (a) The biofilm covered on NPCF-3 anode; (b) morphology of the area without biofilm coverage for NPCF-3 anode.

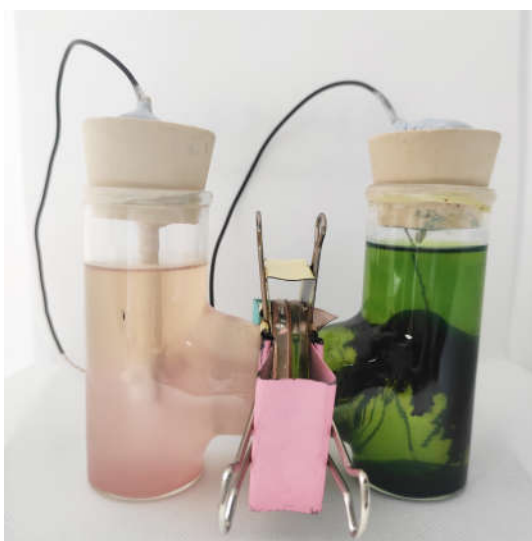

**Figure S10.** Dual-chamber MFC device

**Table S1** Summary of the diameter, bulk density,  $I_D/I_G$  ratio and power density of different carbon fiber materials.

| Samples      | Diameter (nm) | Apprent density (mg mL <sup>-1</sup> ) | $I_D/I_G$ | Power density in CN32 MFC (mW m <sup>-2</sup> ) |
|--------------|---------------|----------------------------------------|-----------|-------------------------------------------------|
| CPAN         | 230           | 66.64                                  | 1.012     | 277±26                                          |
| NPCF-1       | 420           | 15.40                                  | 1.012     | 780±57                                          |
| NPCF-2       | 740           | 11.12                                  | 1.008     | 997±61                                          |
| NPCF-3       | 1150          | 5.84                                   | 1.004     | 902±36                                          |
| carbon cloth | ~10000        | 363                                    | -         | 101±5                                           |
